# Supplementary material for: Perfluoropolyether Nanoemulsion Encapsulating Chlorin e6 for Sonodynamic and Photodynamic Therapy of Hypoxic Tumor
Source: Nanomaterials (Basel). 2020 Oct 19;10(10):2058. doi: 10.3390/nano10102058 (PMC7603101; doi:10.3390/nano10102058)
Supplement: Supplementary file 1 [file nanomaterials-10-02058-s001.pdf]

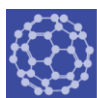

## Supplementary Materials

# Perfluoropolyether Nanoemulsion Encapsulating Chlorin e6 for Sonodynamic and Photodynamic Therapy of Hypoxic Tumor

Liang Hong <sup>1</sup>, Artem M. Pliss <sup>2</sup>, Ye Zhan <sup>3</sup>, Wenhan Zheng <sup>3</sup>, Jun Xia <sup>3</sup>, Liwei Liu <sup>1,\*</sup>, Junle Qu <sup>1,\*</sup> and Paras N. Prasad <sup>2,\*</sup>

<sup>1</sup> Key Laboratory of Optoelectronic Devices and Systems of Ministry of Education and Guangdong Province, College of Optoelectronic Engineering, Shenzhen University, Shenzhen 518060, China; hongliang0702@126.com

<sup>2</sup> Institute for Lasers, Photonics and Biophotonics, University at Buffalo, State University of New York, Buffalo, New York, NY 14260, USA; ampliss@buffalo.edu

<sup>3</sup> Department of Biomedical Engineering, University at Buffalo, State University of New York, Buffalo, New York, NY 14260, USA; yezhan@buffalo.edu (Y.Z.); wzheng26@buffalo.edu (W.Z.); junxia@buffalo.edu (J.X.)

\* Correspondence: liulw@szu.edu.cn (L.L.); jlqu@szu.edu.cn (J.Q.); pnprasad@buffalo.edu (P.N.P.)

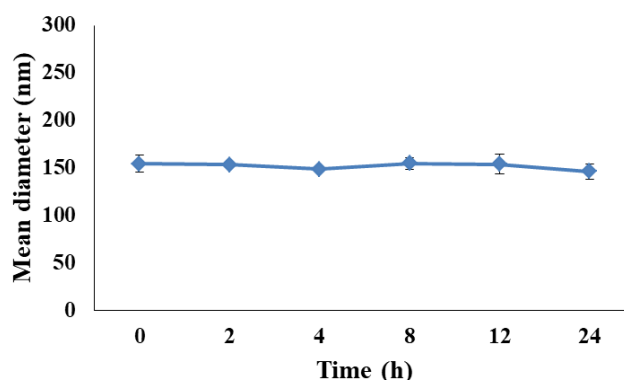

**Figure S1.** Droplet diameter change of the Ce6-P/W NEs in phosphate buffered saline throughout storage at 37 °C for 24 h. Ce6 concentration, 16 µg/mL. Data were presented as mean value ± standard deviation. After Levene's test for equality of variances, one-way analysis of variance (ANOVA) and Bonferroni multiple comparison test was employed for the comparison of mean values. n = 3. Ce6-P/W NE, chlorin e6-perfluoropolyether (PFPE)/water nanoemulsion.

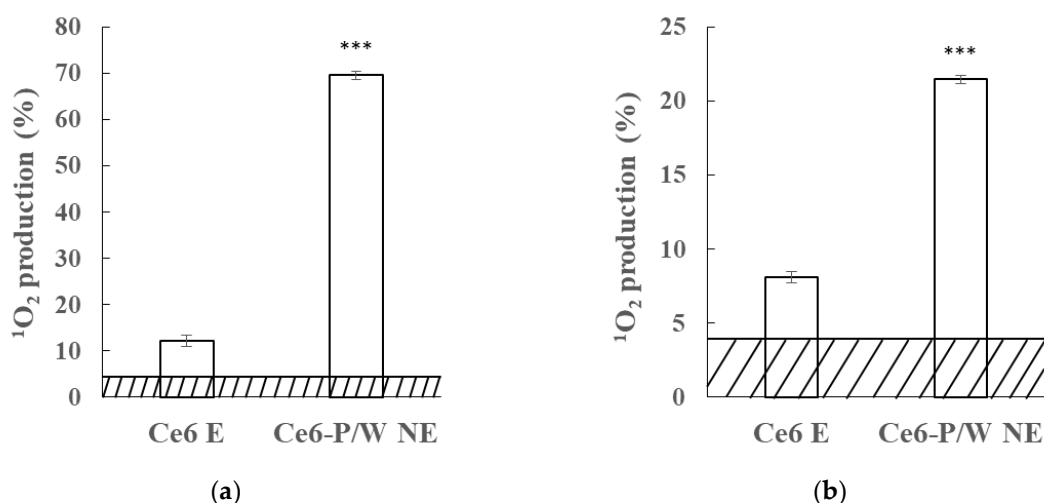

**Figure S2.**  $^1\text{O}_2$  production of Ce6 Es and Ce6-P/W NEs under ultrasonic irradiation ( $0.25 \text{ W/cm}^2$ ,  $2.1 \text{ MHz}$ ,  $1 \text{ min}$ ) in normoxic condition at (a)  $1 \text{ mg/mL}$  (Ce6 concentration,  $20 \text{ }\mu\text{g/mL}$ ) or (b)  $0.5 \text{ mg/mL}$  (Ce6 concentration,  $10 \text{ }\mu\text{g/mL}$ ) Ce6-P/W NE. Data were presented as mean value  $\pm$  standard deviation. After Levene's test for equality of variances, one-way analysis of variance (ANOVA) and Bonferroni multiple comparison test was employed for the comparison of mean values.  $n = 3$ . \*\*\*,  $p < 0.001$ . The shadow represents background signals detected by control (*i.e.*, water containing only DPBF) groups ( $2.9922 \pm 0.8720\%$ ;  $4.1107 \pm 0.4619\%$ ).  $^1\text{O}_2$ , singlet oxygen. Ce6 E, chlorin e6 emulsion. Ce6-P/W NE, chlorin e6-perfluoropolyether (PFPE)/water nanoemulsion. DPBF, 1,3-diphenylisobenzofuran.

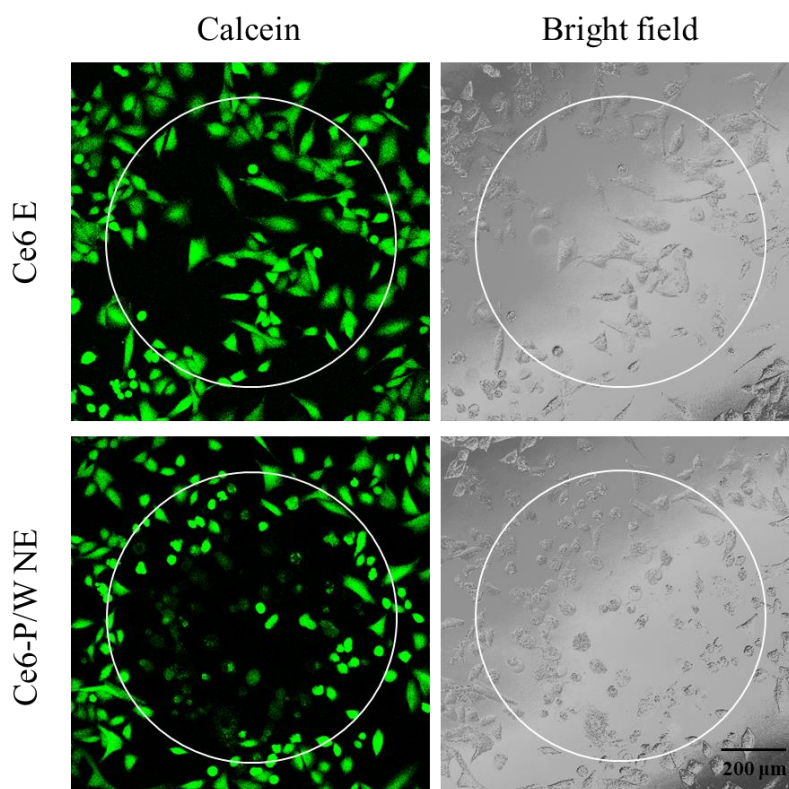

**Figure S3.** Calcein staining and corresponding bright-field images of PC-3 cells treated with Ce6 Es or Ce6-P/W NEs upon light irradiation ( $633 \text{ nm}$ ,  $50 \text{ mW/cm}^2$ ) for  $30 \text{ s}$  in normoxic condition. Ce6-P/W NE concentration,  $400 \text{ }\mu\text{g/mL}$ . Ce6 concentration,  $8 \text{ }\mu\text{g/mL}$ . Green color shows living cells. The white circle indicates the irradiation area. Ce6 E, chlorin e6 emulsion. Ce6-P/W NE, chlorin e6-perfluoropolyether (PFPE)/water nanoemulsion.

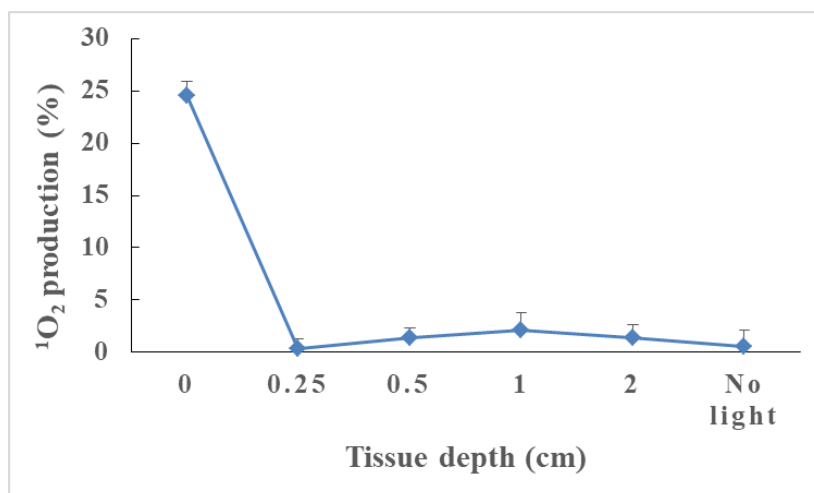

**Figure S4.**  $^1\text{O}_2$  production of Ce6-P/W NEs at 200  $\mu\text{g/mL}$  (Ce6 concentration, 4  $\mu\text{g/mL}$ ) at different tissue depth when irradiated with white light (60 lumens, 1 min). Data were presented as mean value  $\pm$  standard deviation. After Levene's test for equality of variances, one-way analysis of variance (ANOVA) and Bonferroni multiple comparison test was employed for the comparison of mean values.  $n = 3$ .  $^1\text{O}_2$ , singlet oxygen. Ce6-P/W NE, chlorin e6-perfluoropolyether (PFPE)/water nanoemulsion.

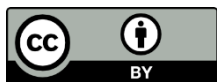

© 2020 by the authors. Submitted for possible open access publication under the terms and conditions of the Creative Commons Attribution (CC BY) license (<http://creativecommons.org/licenses/by/4.0/>).
